# Supplementary material for: Transient Gut Microbiota Modulation and Bacteroides Predict Constipation Recurrence in Cerebral Palsy: A 4-Year Synbiotics Study
Source: Research Square preprint supplement (doi:10.21203/rs.3.rs-7150409/v1), 2025-09-24
Supplement: Supplementary file 1 [file 2f43e86c892a3a873ccbd5df.xlsx]

## Sheet: Sheet1
Genus	Enrichment direction	LDA value	pvalue	Mean_A	SD_A	Mean_B	SD_B
Intestinibacter	6month_A	2.0197	0.00657468	0.000126577	0.000168203	0.000137686	0.000398638
Negativibacillus	6month_A	2.06974	0.0377927	0.00099474	0.00276446	0.000445649	0.000782729
