# Supplementary material for: Transient Gut Microbiota Modulation and Bacteroides Predict Constipation Recurrence in Cerebral Palsy: A 4-Year Synbiotics Study
Source: Research Square preprint supplement (doi:10.21203/rs.3.rs-7150409/v1), 2025-09-24
Supplement: Supplementary file 2 [file 6b113503fe0604432e996b53.xlsx]

## Sheet: Sheet1
Genus	Enrichment direction	LDA value	pvalue	Mean_A	SD_A	Mean_B	SD_B
Bacillus	Pre_A	2.90697	0.0219468	0.00044333	0.00145996	2.81624e-06	2.23532e-05
Bacteroides	Pre_A	4.73766	0.00947637	0.19997	0.0765586	0.0798919	0.0804007
Christensenellaceae R-7 group	Pre_B	4.14136	0.0287348	0.00720554	0.00857114	0.0230187	0.0284307
Moraxella	Pre_A	2.41843	0.0219468	0.000146333	0.000506911	0	0
Parabacteroides	Pre_A	4.46029	0.0379404	0.0798026	0.0524191	0.0385366	0.0445539
Prevotella_7	Pre_B	3.32157	0.0411151	0.0152692	0.0292711	0.00384356	0.00580697
Sellimonas	Pre_A	3.24773	0.0372032	0.00454104	0.00343505	0.00227573	0.00350888
Streptomyces	Pre_A	2.41249	0.0219468	0.000139401	0.0004829	8.34873e-06	6.6266e-05
