# Supplementary material for: Transient Gut Microbiota Modulation and Bacteroides Predict Constipation Recurrence in Cerebral Palsy: A 4-Year Synbiotics Study
Source: Research Square preprint supplement (doi:10.21203/rs.3.rs-7150409/v1), 2025-09-24
Supplement: Supplementary file 3 [file 71202b8382c240e679a75732.xlsx]

## Sheet: Sheet1
Genus	Enrichment direction	LDA value	pvalue	Mean_A	SD_A	Mean_B	SD_B
Alistipes	4yrs_A	3.87385	0.0176922	0.0187341	0.0154788	0.00780719	0.00968683
Bacteroides	4yrs_A	4.91581	0.00485127	0.209997	0.0765586	0.0798919	0.0804007
Caldicoprobacter	4yrs_B	2.37393	0.0410644	0	0	0.000157277	0.00104086
Flavonifractor	4yrs_A	3.21746	0.0261654	0.00443501	0.00270681	0.00262907	0.00322778
Limosilactobacillus	4yrs_A	2.45383	0.0410644	0.000200997	0.000446903	8.26748e-05	0.000198738
NK4A214 group	4yrs_B	3.19734	0.00947637	0.00429221	0.00536698	0.00735545	0.00874343
Oscillibacter	4yrs_A	3.45565	0.0144402	0.00556051	0.00547926	0.0048626	0.00634747
Prevotella_7	4yrs_A	4.2271	0.0379404	0.0152692	0.0292711	0.00384356	0.00580697
Pyramidobacter	4yrs_B	3.7069	0.0176922	0.00242479	0.00348957	0.0104345	0.0257237
Terrisporobacter	4yrs_A	2.04789	0.0484335	0.000105457	0.000231081	4.30311e-05	0.000128763
UCG-002	4yrs_B	4.14681	0.0261654	0.0130531	0.0149462	0.0394889	0.036364
UCG-003	4yrs_B	3.04926	0.00757265	0.000848061	0.00112013	0.00225486	0.00258467
Victivallis	4yrs_B	2.63257	0.0300596	8.92445e-05	0.000154579	0.00122644	0.00337588
[Ruminococcus] torques group	4yrs_A	4.22891	0.0176922	0.019988	0.0217099	0.0121242	0.0124656
