# Supplementary material for: Transient Gut Microbiota Modulation and Bacteroides Predict Constipation Recurrence in Cerebral Palsy: A 4-Year Synbiotics Study
Source: Research Square preprint supplement (doi:10.21203/rs.3.rs-7150409/v1), 2025-09-24
Supplement: Supplementary file 4 [file 86881200532b4c7b7fa639f8.xlsx]

## Sheet: plt_fun_M6_AB_DA
Path	Path description	Enrichment direction	DLA value	pvalue	meansd_M6_A	meansd_M6_B
OANTIGEN-PWY	O-antigen building blocks biosynthesis (E. coli)	M6_B	2.41199	0.0453522	0.442003 ± 0.028821	0.499066 ± 0.080749
PANTO-PWY	phosphopantothenate biosynthesis I	M6_A	2.63643	0.031585	0.319611 ± 0.038551	0.240051 ± 0.076369
PWY-1269	CMP-3-deoxy-D-manno-octulosonate biosynthesis	M6_A	2.65826	0.0261654	0.251017 ± 0.06279	0.165655 ± 0.078634
PWY-5121	superpathway of geranylgeranyl diphosphate biosynthesis II (via MEP)	M6_B	2.29822	0.0453522	0.557951 ± 0.016894	0.596884 ± 0.055258
PWY-6305	superpathway of putrescine biosynthesis	M6_A	2.15633	0.0144402	0.093508 ± 0.010885	0.071484 ± 0.026588
PWY-6386	UDP-N-acetylmuramoyl-pentapeptide biosynthesis II (lysine-containing)	M6_B	2.20655	0.031585	0.60768 ± 0.01437	0.644756 ± 0.058336
PWY-6387	UDP-N-acetylmuramoyl-pentapeptide biosynthesis I (meso-diaminopimelate containing)	M6_B	2.28544	0.0379404	0.617073 ± 0.016047	0.652459 ± 0.055927
PWY-6467	Kdo transfer to lipid IVA III (Chlamydia)	M6_A	2.66338	0.0453522	0.24143 ± 0.065218	0.155533 ± 0.080178
PWY-6527	stachyose degradation	M6_B	2.97534	0.0453522	0.738015 ± 0.052427	0.867618 ± 0.167123
PWY-6545	pyrimidine deoxyribonucleotides de novo biosynthesis III	M6_A	2.35853	0.021569	0.171953 ± 0.024639	0.13211 ± 0.03518
PWY-6895	superpathway of thiamine diphosphate biosynthesis II	M6_A	2.64806	0.0379404	0.294226 ± 0.080311	0.205677 ± 0.05459
PWY-7221	guanosine ribonucleotides de novo biosynthesis	M6_B	2.56921	0.0379404	0.617479 ± 0.009186	0.690875 ± 0.083246
PWY-7991	toxoflavin biosynthesis	M6_A	2.64932	0.0453522	0.32931 ± 0.042515	0.250732 ± 0.081395
PWY-8187	L-arginine degradation XIII (reductive Stickland reaction)	M6_B	2.45634	0.0453522	0.133382 ± 0.028572	0.187323 ± 0.056861
SER-GLYSYN-PWY	superpathway of L-serine and glycine biosynthesis I	M6_B	2.47158	0.0453522	0.546233 ± 0.014118	0.586476 ± 0.048795
